# Supplementary material for: Bio-inspired high-performance solid-state supercapacitors with the electrolyte, separator, binder and electrodes entirely from kelp
Source: Royal Society of Chemistry journal article supplement (doi:10.1039/c7ta08095f), 2017-01-01
Supplement: c7ta08095f1.pdf [file c7ta08095f1.pdf]

## Bio-inspired high-performance solid-state supercapacitors with electrolyte, separator, binder and electrodes entirely from *kelp*

Juan Zeng, Lu Wei and Xin Guo

*Laboratory of Solid State Ionics, School of Materials Science and Engineering, Huazhong University of Science and Technology, Wuhan 430074, P. R. China*

**Table S1.** Property parameters of the commercial activated carbon TF-B520

|                       |                                            |
|-----------------------|--------------------------------------------|
| Density               | 0.32-0.40 g cm <sup>-3</sup>               |
| Particle size         | 5(±1) μm                                   |
| Ash content           | <0.07%                                     |
| pH value              | 6.0-7.0                                    |
| Specific surface area | 2000 (±100) m <sup>2</sup> g <sup>-1</sup> |
| Pore volume           | 1.0-1.2 cm <sup>3</sup> g <sup>-1</sup>    |
| Pore size             | 2.0-2.2 nm                                 |
| Carbon content        | >95%                                       |
| Metal ions from ICP   | <1000 ppm                                  |

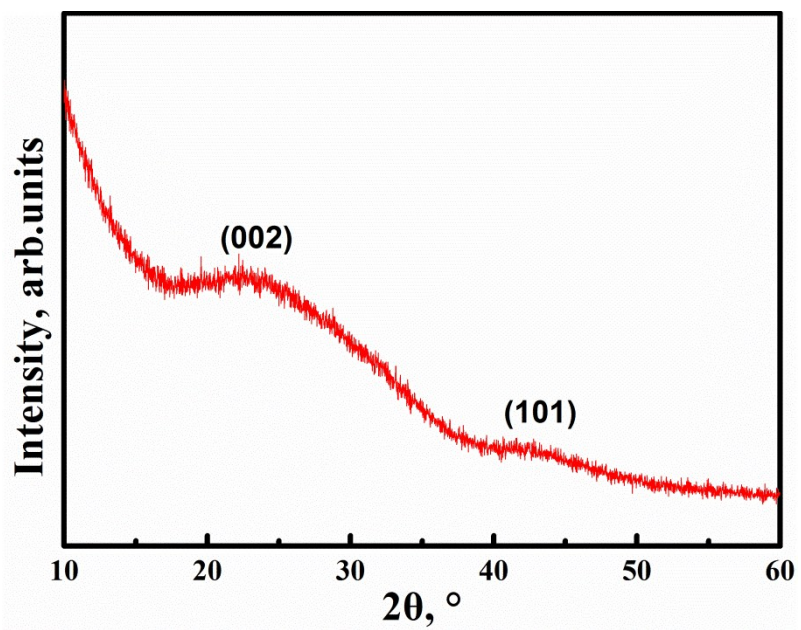

Fig. S1 XRD pattern of the *kelp*-derived activated carbon (KAC).

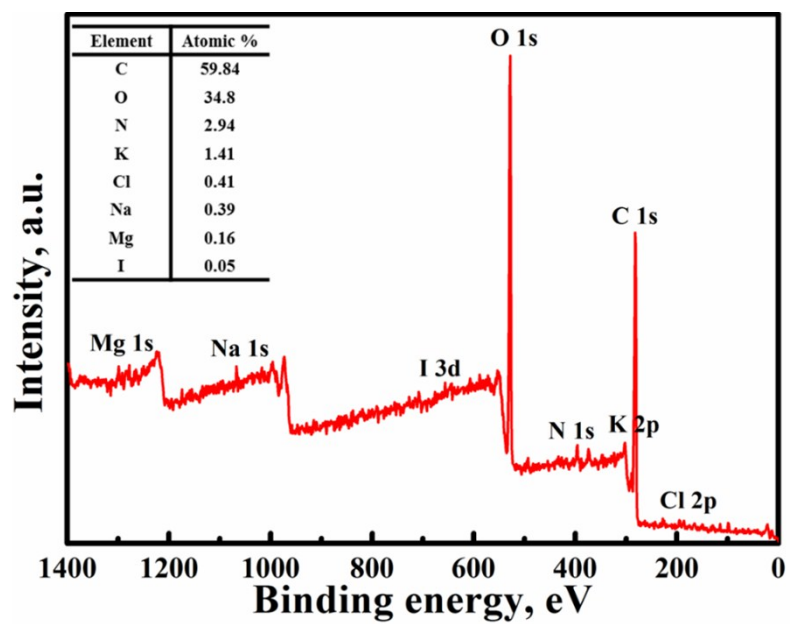

**Fig. S2** XPS spectrum with all elements detected in *kelp*, the inset shows the atomic contents of each element.

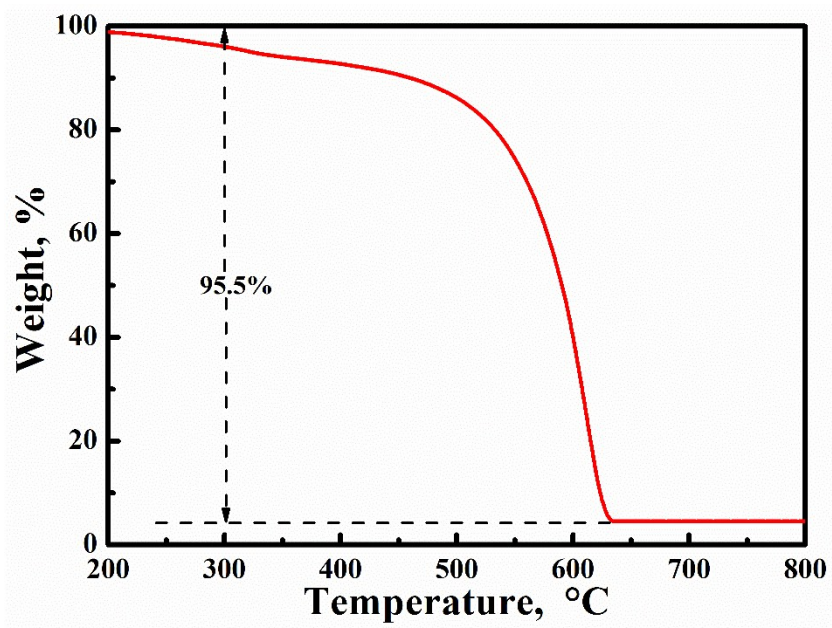

**Fig. S3** Thermogravimetric curve of KAC in air.

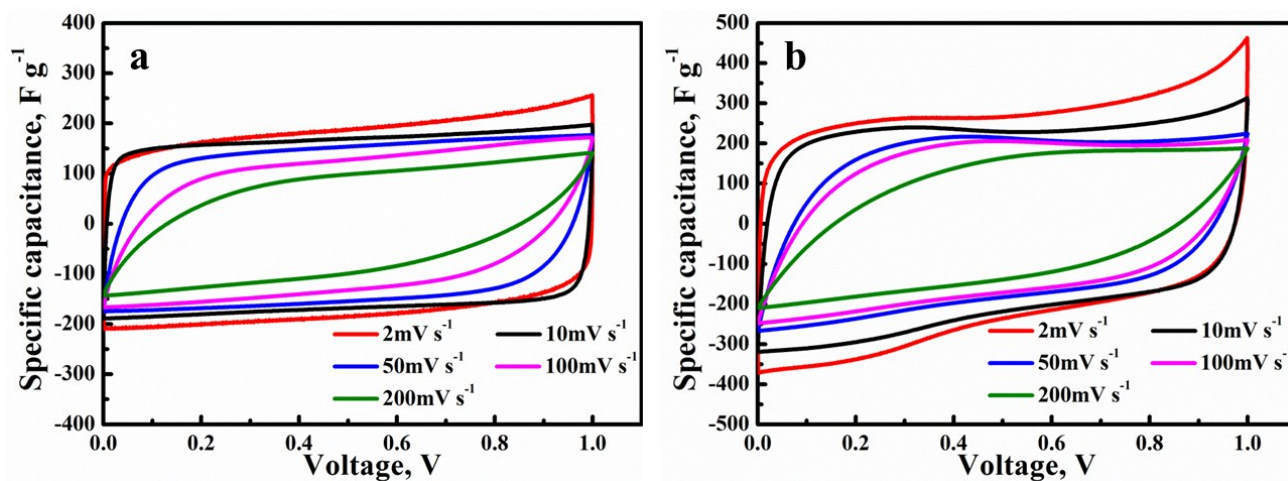

**Fig. S4** CV curves of (a) supercapacitor based on commercial activated carbon (TF-B520) electrodes, Na-alginate binder, Na-alginate separator and Na-alginate hydrogel electrolyte, and (b) supercapacitor with KAC electrodes, PTFE binder, commercial polypropylene separator and 1 M H<sub>2</sub>SO<sub>4</sub> aqueous electrolyte.

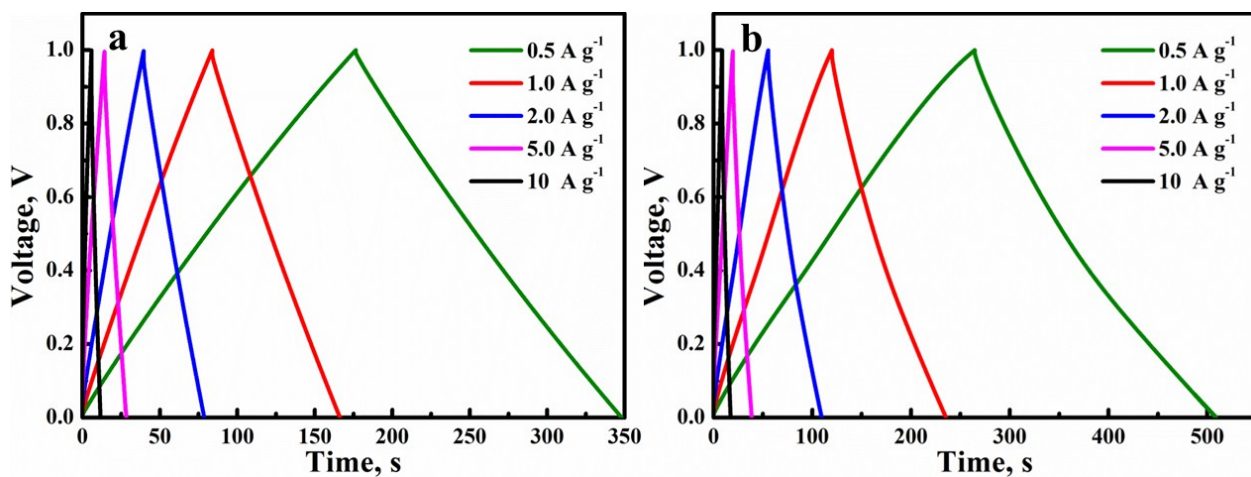

**Fig. S5** C-D curves of (a) supercapacitor based on commercial activated carbon (TF-B520) electrodes, Na-alginate binder, Na-alginate separator and Na-alginate hydrogel electrolyte, and (b) supercapacitor with KAC electrodes, PTFE binder, commercial polypropylene separator and 1 M  $\text{H}_2\text{SO}_4$  aqueous electrolyte.

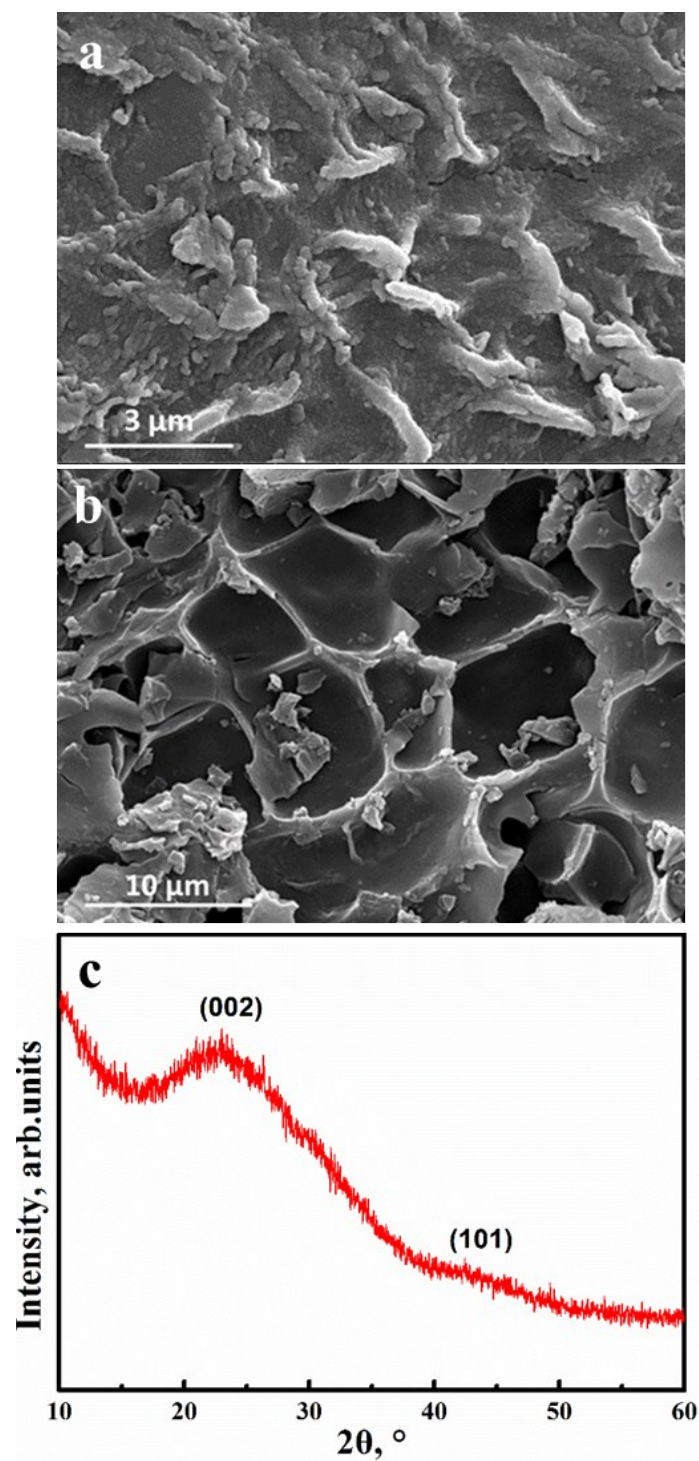

**Fig. S6** (a, b) SEM images and (c) XRD pattern of KAC electrode material after charge-discharge cycling tests.

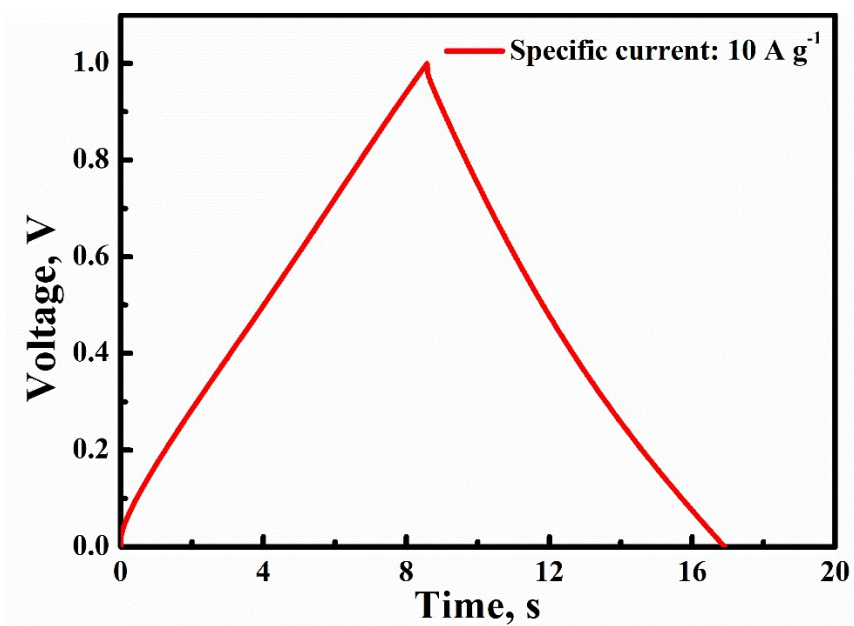

**Fig. S7** C-D curve of the “all-kelp” solid-state supercapacitor re-tested at 60 °C after 10,000 C-D cycles at 10 A g<sup>-1</sup>.



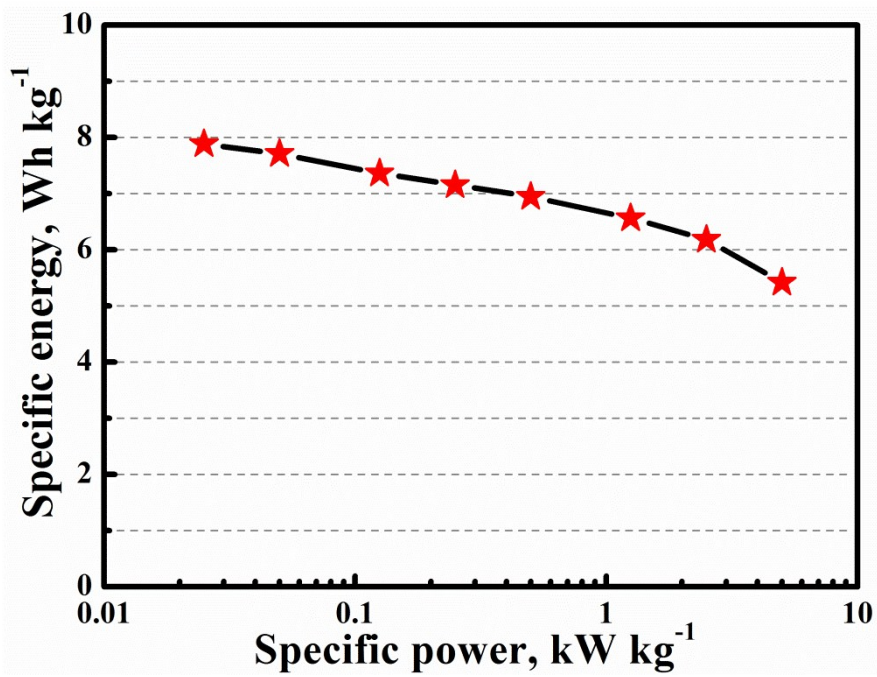

Fig. S8 Ragone plot of the "all-kelp" solid-state supercapacitor.

**Table S2** Carbon electrode materials for all-solid-state supercapacitors

| Electrode material                    | Doped        | SSA<br>(m <sup>2</sup> g <sup>-1</sup> ) | Electrolyte                            | Capacitance<br>(F g <sup>-1</sup> ) | Reference |
|---------------------------------------|--------------|------------------------------------------|----------------------------------------|-------------------------------------|-----------|
| <i>Kelp</i> -derived activated carbon | —            | 4425                                     | Na-alginate gel                        | 227                                 | This work |
| Graphene hydrogel film                | —            | 414                                      | PVA-H <sub>2</sub> SO <sub>4</sub> gel | 186                                 | 1         |
| Carbon nanotubes                      | —            | 456                                      | [EMIM][NTf <sub>2</sub> ]-silica gel   | 135                                 | 2         |
| Graphene-cellulose paper              | —            | —                                        | PVA-H <sub>2</sub> SO <sub>4</sub> gel | 120                                 | 3         |
| 3D graphene                           | —            | 1661                                     | PVA-H <sub>2</sub> SO <sub>4</sub> gel | 80                                  | 4         |
| Activated carbon fibers               | —            | 1476                                     | PVA-H <sub>3</sub> PO <sub>4</sub> gel | 43.8                                | 5         |
| Activated carbon cloth                | —            | 61.2                                     | PVA-H <sub>2</sub> SO <sub>4</sub> gel | 0.00155                             | 6         |
| Carbon nanofibers                     | <i>N</i> -   | 312                                      | PVA-H <sub>2</sub> SO <sub>4</sub> gel | 175                                 | 7         |
| Graphene aerogel                      | <i>N,B</i> - | 249                                      | PVA-H <sub>2</sub> SO <sub>4</sub> gel | 62                                  | 8         |

## References

1. Y. X. Xu, Z. Y. Lin, X. Q. Huang, Y. Liu, Y. Huang and X. F. Duan, *ACS Nano*, 2013, **7**, 4042–4049.
2. Y. J. Kang, H. Chung, C. H. Han and W. Kim, *Nanotechnology*, 2012, **23**, 065401.
3. Z. Weng, Y. Su, D. W. Wang, F. Li, J. H. Du and H. M. Cheng, *Adv. Energy Mater.*, 2011, **1**, 917–922.
4. A. Ramadoss, K. Y. Yoon, M. J. Kwak, S. I. Kim, S. T. Ryu and J. H. Jang, *J. Power Sources*, 2017, **337**, 159–165.
5. W. J. Ma, S. H. Chen, S. Y. Yang, W. P. Chen, W. Weng and M. F. Zhu, *ACS Appl. Mater. Interfaces*, 2016, **8**, 14622–14627.
6. G. M. Wang, H. Y. Wang, X. H. Lu, Y. C. Ling, M. H. Yu, T. Zhai, Y. X. Tong and Y. Li, *Adv. Mater.*, 2014, **26**, 2676–2682.
7. L. F. Chen, Z. H. Huang, H. W. Liang, W. T. Yao, Z. Y. Yu and S. H. Yu, *Energy Environ. Sci.*, 2013, **6**, 3331–3338.
8. Z. S. Wu, A. Winter, L. Chen, Y. Sun, A. Turchanin, X. Feng and K. Müllen, *Adv. Mater.*, 2012, **24**, 5130–5135.

**Table S3** Comparison of the electrochemical performance of advanced all-solid-state supercapacitors with carbon-based materials reported in literatures. Here (E) represents the calculation method based on electrode level and (D) represents calculation method based on device level.

| Electrode material                                           | Gravimetric capacitance (F g <sup>-1</sup> ) | Volumetric capacitance (F cm <sup>-3</sup> ) | Volumetric energy density (Wh L <sup>-1</sup> ) | Cycling retention     | Reference |
|--------------------------------------------------------------|----------------------------------------------|----------------------------------------------|-------------------------------------------------|-----------------------|-----------|
| <i>Kelp</i> -derived AC                                      | 227                                          | 72.3 (E)<br>18.1 (D)                         | 2.5                                             | 97% (10,000 cycles)   | This work |
| Graphene hydrogel film                                       | 186                                          | 31 (E)                                       | 1.07                                            | 97.5% (10,000 cycles) | 1         |
| CNT fiber//CNT sheet                                         | 59                                           | 32.1 (E)                                     | 1.11                                            | —                     | 2         |
| AC fiber                                                     | 43.8                                         | 27.6 (D)                                     | 2.5                                             | 90.4% (10,000 cycles) | 3         |
| Carbon nanofiber                                             | 84                                           | 2.1 (D)                                      | 2.5                                             | 96% (10,000 cycles)   | 4         |
| MWCNT/carbon microfiber                                      | 11.1                                         | 14.1 (E)                                     | 0.14                                            | 94% (1000 cycles)     | 5         |
| AWC//WC@MnO <sub>2</sub>                                     | 35.6                                         | 14.4 (D)                                     | 6.4                                             | 93% (10,000 cycles)   | 6         |
| CNT/vanadium nitride                                         | 5.2                                          | 7.9 (D)                                      | 0.54                                            | 82% (10,000 cycles)   | 7         |
| H-TiO <sub>2</sub> @MnO <sub>2</sub> //H-TiO <sub>2</sub> @C | 139.6                                        | 0.7 (D)                                      | 0.3                                             | 91.2% (5000 cycles)   | 8         |
| AC//polypyrrole@MnO <sub>2</sub>                             | 261                                          | 19.3 (D)                                     | 8.67                                            | 98.6% (1000 cycles)   | 9         |
| Graphene//Co <sub>3</sub> O <sub>4</sub>                     | 117                                          | 2.1 (D)                                      | 0.62                                            | 84% (1000 cycles)     | 10        |

AC: activated carbon; CNT: carbon nanotube; MWCNT: multi-wall carbon nanotube; AWC: activated wood carbon; WC: wood carbon.

## References

1. Y. X. Xu, Z. Y. Lin, X. Q. Huang, Y. Liu, Y. Huang and X. F. Duan, *ACS Nano*, 2013, **7**, 4042–4049.
2. X. L. Chen, L. B. Qiu, J. Ren, G. Z. Guan, H. J. Lin, Z. T. Zhang, P. N. Chen, Y. G. Wang and H. S. Peng, *Adv. Mater.*, 2013, **25**, 6436–6441.
3. W. J. Ma, S. H. Chen, S. Y. Yang, W. P. Chen, W. Weng and M. F. Zhu, *ACS Appl. Mater. Interfaces*, 2016, **8**, 14622–14627.
4. Y. M. Sun, R. B. Sills, X. L. Hu, Z. W. Seh, X. Xiao, H. H. Xu, W. Luo, H. Y. Jin, Y. Xin, T. Q. Li, Z. L. Zhang, J. Zhou, W. Cai, Y. H. Huang and Y. Cui, *Nano Lett.*, 2015, **15**, 3899–3906.
5. V. T. Le, H. Kim, A. Ghosh, J. Kim, J. Chang, Q. A. Vu, D. T. Pham, J. H. Lee, S. W. Kim and Y. H. Lee, *ACS Nano*, 2013, **7**, 5940–5947.
6. C. J. Chen, Y. Zhang, Y. J. Li, J. Q. Dai, J. W. Song, Y. G. Yao, Y. H. Gong, I. Kierzewski, J. Xie and L. B. Hu, *Energy Environ. Sci.*, 2017, **10**, 538–545.
7. X. Xiao, X. Peng, H. Y. Jin, T. Q. Li, C. C. Zhang, B. Gao, B. Hu, K. F. Huo and J. Zhou, *Adv. Mater.*, 2013, **25**, 5091–5097.
8. X. H. Lu, M. H. Yu, G. M. Wang, T. Zhai, S. L. Xie, Y. C. Ling, Y. X. Tong and Y. Li, *Adv. Mater.*, 2013, **25**, 267–272.
9. J. Y. Tao, N. S. Liu, L. Y. Li, J. Su and Y. H. Gao, *Nanoscale*, 2014, **6**, 2922–2928.
10. X. F. Wang, B. Liu, R. Liu, Q. F. Wang, X. J. Hou, D. Chen, R. M. Wang and G. Z. Shen, *Angew. Chem.*, 2014, **53**, 1849–1853.
